# Supplementary material
Source: publisher figshare collection journal article supplement (https://asha.figshare.com/articles/dataset/_/11886219)
Supplement: Supplementary file 1 [file 1]

## Sheet: RCT Data
Group_Assignment	Participant_Number	Site	Age_in_months	Sex	WASI2_Matrix_Reas_Tscore	GFTA2_Percentile	CELF5_Formulated_Sent_Scaled_Score	CELF5_Recalling_Sent_Scaled_Score	PPVT4_Standard_Score	Stimulability_PercentCorr_PreTx	CTOPP2_Elision_Scaled_Score	CTOPP2_Phonemic_Isolation_Scaled_Score	LAT_Std_Score	LAT_Percentile	PreTx_r_accuracy	MidTx_r_Accuracy	PostTx_r_accuracy	2Month_Followup_r_Accuracy	Acuity_Pre	Acuity_Pre_SqRoot	Acuity_Post	Acuity_Post_SqRt	TotalNumPracticeTrialsCPP	Fidelity_TX_NumWeeks	Fidelity_Avg_KR	Fideilty_AvgKP	FidelityFeedbackKRandKP	Treatment_history	Tx_History_Details
1	1	2	97	M	52	3	11	14	121	0	11	7	58	0	11.2	36.4	46.9	64.2	#NULL!	#NULL!	8	2.82843	2021	9	0.925	0.925	0.925	1	speech treatment since age of 5
1	2	2	99	F	60	7	11	14	132	0	11	8	76	5.5	33.2	56	72.3	95.2	2.3	1.51658	3.1	1.76068	1741	6.71	0.925	0.925	0.925	1	speech treatment since age of 4
1	3	2	138	M	31	1	13	12	99	0	10	9	61	0	32.9	33	55.2	55.6	4.9	2.21359	2.2	1.48324	1903	7	0.895	0.895	0.895	1	speech treatment since age of 5
1	4	2	136	M	57	3	9	6	131	0	9	11	61	0	25.2	28.2	23.3	21	3.6	1.89737	1.5	1.22474	2052	9.29	0.685	0.685	0.685	1	treatment since age of 3
1	5	2	171	M	60	0	12	10	98	0	9	9	57	0	13.71	13.6	45.7	36.6935	1.9	1.3784	1.9	1.3784	2041	8.29	0.815	0.815	0.815	1	speech treatment age 3 - 8
2	6	2	103	F	#NULL!	3	15	14	114	0	13	11	59	0	21.095	31.6	43.4	39.9194	1.8	1.34164	#NULL!	#NULL!	2164	8.29	0.83	0.83	0.83	1	school-based speech treatment
2	7	2	100	F	67	3	16	18	149	61	11	8	59	0	18.7	7.2	59	89.9194	1.6	1.26491	0.6	0.774597	2111	8.29	0.98	0.98	0.98	0	no prior therapy
2	8	2	115	M	52	2	18	17	97	0	13	11	61	0	19.245	18.2365	40.675	46.0181	6.9	2.62679	1.8	1.34164	2046	8	0.74	0.74	0.74	1	private tx age 5, school-based tx 7-now
1	9	1	94	M	70	7	15	17	154	0	14	9	60	1	22.63	22.2689	29	25	2.49858	1.58069	2.09	1.44568	1723	9.57	0.95275	1	0.976375	1	speech treatment since age of 4
2	10	1	157	M	30	1	10	14	119	45	9	10	61	0	50.8267	71.2	86.2	82.2	1.99394	1.41207	1	1	1944	7	0.964267	0.998	0.981133	1	speech treatment ages 6-10
2	11	1	126	M	62	1	17	18	130	0	11	10	61	0	2.73333	5.90551	17.68	38.6	1.67935	1.2959	0	0	1941	11.43	0.9605	0.9735	0.967	1	speech treatment ages 9-10
1	12	1	124	M	59	3	16	13	118	0	11	#NULL!	60	0	5.53333	8.2	8.6	8.6	2.71824	1.64871	0	0	1035	6.71	0.88	0.92	0.9	1	speech treamtnet since age of 4
1	13	1	99	M	63	7	14	10	112	0	9	12	58	0	6.2	12.0968	56.4	62.4	1.27081	1.1273	1	1	1518	7.29	0.981491	0.981481	0.981486	1	speech treamtnet since age of 5
2	14	1	85	M	61	6	16	11	114	0	11	12	58	0	3.315	50.8929	46.1	80.6	2.47206	1.57228	0	0	2268	7	0.99	1	0.995	1	speech treatment since age of 6
1	15	1	108	M	57	5	10	9	100	0	9	7	61	0	2.2	69.8	94.2	93.4	1.11743	1.05709	1.44	1.2	2137	7.43	0.9375	1	0.96875	0	no prior therapy
2	16	1	94	F	43	4	10	9	109	0	7	8	73	3	9.5	14.6	26.6	48.5	1.833	1.35388	1.61	1.26886	2268	6.86	0.929	0.9015	0.91525	1	speech therapy since age of 6
2	17	1	141	F	42	0	7	6	92	0	13	9	78	6	9.8	11.6	17	17	4.18613	2.046	3.53	1.87883	2370	8	0.9535	0.981	0.96725	1	speech treatment ages 3-10
1	18	1	186	F	47	0	10	9	111	0	11	12	50	0	12.7	20.2	68.3	#NULL!	1.22473	1.10668	1.12	1.0583	2135	8	0.9815	0.9877	0.9846	1	speech treatment ages 8-9
1	19	1	96	M	53	6	13	10	99	0	10	10	59	0	5.7	10.6	75.3	71.8	2.41701	1.55467	0	0	2023	8	1	0.9938	0.9969	1	speech treatment ages 3.5-5
2	20	1	177	F	67	0	15	16	131	0	12	13	57	0	4.9	39	51.3	56.2	1.26985	1.12687	1.79	1.33791	2201	6.57	1	1	1	1	speech treatment ages 3-4, briefly at 11
1	21	1	143	M	56	0	8	6	99	24	9	9	72	3	50.9	67.8	68.6	84.6	8	2.82843	4.96	2.22711	2263	7.43	1	0.9938	0.9969	1	age 3 to present
2	22	1	102	M	46	5	11	9	100	21	10	12	59	0	24.5	42	75.37	89.4	1.56213	1.24985	0	0	2217	8	1	1	1	0	no prior therapy
1	23	1	99	M	56	0	8	9	109	0	10	3	58	0	8.7	#NULL!	#NULL!	#NULL!	2.6	1.61245	#NULL!	#NULL!	#NULL!	#NULL!	#NULL!	#NULL!	#NULL!	1	age 3 to present
2	24	1	137	F	51	1	9	8	104	0	10	10	61	0	14.7	80.8	85.8	89.4	1.4314	1.19641	1.16	1.07703	2268	7.29	1	0.995	0.9975	1	therapy K - grade 3
1	25	1	117	M	43	4	9	13	139	6	10	9	61	0	3	40.6726	56.4	64.8	2.27453	1.50815	1	1	2430	7	0.99385	0.9969	0.995375	1	therapy age 2 1/2 - present
1	26	1	113	F	55	1	7	10	115	27	9	11	61	0	9.8	13	10.21	12.6	1.49377	1.2222	1.41	1.18743	1944	7.14	1	0.98765	0.993825	1	therapy at ages 6 and 8
2	27	1	139	M	40	1	10	10	119	0	9	11	61	0	7.4	11.6	21.4	27.8	1.55512	1.24705	1.49	1.22066	2268	6.14	0.99385	0.99075	0.9923	0	no prior therapy
2	28	1	126	M	73	2	10	13	126	0	13	10	61	0	1.9	2.2	29.3	2.8	1.75949	1.32646	0	0	2268	6.43	1	0.9969	0.99845	1	speech tx at age 7, dismissed
1	29	1	124	F	56	2	12	13	95	0	13	9	61	0	12.9	68	69.7	91	0.72	0.848528	0	0	2268	6.29	1	0.9969	0.99845	1	informal services at age 8
2	30	1	166	F	60	0	14	11	115	27	13	10	57	0	33	56	79.4	#NULL!	2.9	1.70294	1	1	2106	9.14	0.997	0.9969	0.99695	0	no prior therapy
2	31	1	97	F	60	8	13	13	124	0	13	7	62	1	31	25.6	70.2	88.2	0.88	0.938083	1.22	1.10454	2236	7.14	1	0.9969	0.99845	0	no prior therapy
1	32	1	164	F	52	1	16	13	114	30	12	10	61	0	22.2	85.6	91.2	93.4	1.30617	1.14288	0	0	2268	6.29	1	0.99075	0.995375	1	speech therapy ages 4-7
2	33	1	96	M	44	3	9	10	112	0	13	11	58	0	7.6	10.8	33.7	54.8	6.63882	2.57659	1.73	1.31529	2268	6.43	0.9753	0.997	0.98615	1	therapy age 6 - present
1	34	1	127	M	48	1	8	5	109	27	9	8	61	0	26.8	35.89	36.2	51.2	3.53966	1.8814	4.52	2.12603	2106	6.57	1	0.9969	0.99845	1	therapy age 2 - present
1	35	1	112	F	35	2	13	11	103	0	10	9	61	0	13	#NULL!	#NULL!	#NULL!	0	0	#NULL!	#NULL!	#NULL!	#NULL!	#NULL!	#NULL!	#NULL!	1	age 7-9 informal services
2	36	1	147	F	80	0	10	8	119	3	7	9	61	0	15.8	24.8	29.2	32.6	3.9	1.97484	2.2	1.48324	2267	7.57	0.9265	0.96935	0.947925	0	no prior therapy
2	37	1	96	M	58	3	12	11	129	0	13	9	58	0	3.3	46.4	80	#NULL!	0.5	0.707107	1	1	2041	10.29	0.9969	1	0.99845	1	1 yr of speech treatment (age not given)
1	38	1	106	M	55	5	14	18	154	0	14	14	79	8	24.2	12.2	19.2	20.6	1.4	1.18322	2.4	1.54919	2143	9.57	0.9969	0.9969	0.9969	0	no prior therapy
