# Supplementary material
Source: publisher figshare collection journal article supplement (https://asha.figshare.com/articles/dataset/_/11886219)
Supplement: Supplementary file 1 [file 1]

**Supplemental Material S2.** Correlation matrix for pretreatment variables and posttreatment /ɪ/ accuracy ( $N = 38$ ).

| Variables                                    | 1       | 2     | 3     | 4      | 5      | 6     | 7      | 8     | 9     | 10     |
|----------------------------------------------|---------|-------|-------|--------|--------|-------|--------|-------|-------|--------|
| 1. Age                                       | —       |       |       |        |        |       |        |       |       |        |
| 2. WASI-2 Matrix Reasoning T-score           | -.075   | —     |       |        |        |       |        |       |       |        |
| 3. GFTA-2 Percentile                         | -.737** | .169  | —     |        |        |       |        |       |       |        |
| 4. CELF-5 Formulated Sentences Scaled Score  | -.096   | .294  | .267  | —      |        |       |        |       |       |        |
| 5. CELF-5 Recalling Sentences Scaled Score   | -.169   | .223  | .251  | .731** | —      |       |        |       |       |        |
| 6. PPVT-4 Standard Score                     | -.185   | .400* | .326* | .258   | .589** | —     |        |       |       |        |
| 7. Stimulability Percent /ɪ/ correct         | .175    | -.077 | -.217 | -.013  | .069   | .138  | —      |       |       |        |
| 8. CTOPP-2 Elision Scaled Score              | -.121   | .179  | .174  | .429** | .541** | .291  | -.149  | —     |       |        |
| 9. CTOPP-2 Phonemic Isolation Scaled Score   | .240    | -.010 | .037  | .304   | .174   | .135  | -.042  | .201  | —     |        |
| 10. Pre-treatment Perceptual Acuity          | .081    | -.012 | -.202 | -.159  | -.212  | -.181 | .057   | -.046 | -.017 | —      |
| 11. Pre-treatment /ɪ/ Accuracy               | .235    | -.223 | -.066 | -.071  | -.028  | -.002 | .489** | -.032 | -.040 | .326*  |
| 12. Post-treatment /ɪ/ Accuracy <sup>a</sup> | .060    | -.066 | .148  | .061   | -.051  | -.247 | .149   | .021  | -.201 | -.424* |

\*Correlation is significant at the .05 level (2-tailed).

\*\*Correlation is significant at the .01 level (2-tailed).

<sup>a</sup>Partial correlation controlling for pretreatment /ɪ/ accuracy ( $n = 36$ ).
